# Supplementary material for: The Prognostic Signature and Potential Target Genes of Six Long Non-coding RNA in Laryngeal Squamous Cell Carcinoma
Source: Front Genet. 2020 Apr 28;11:413. doi: 10.3389/fgene.2020.00413 (PMC7198905; doi:10.3389/fgene.2020.00413)
Supplement: Supplementary file 4 [file Table_4.XLSX]

## Sheet: lncRNA差异表达
Supplementary Table 4. The differentially expressed lncRNAs between LSCC and normal samples (LSCC compared with normal samples). FC, fold change; FDR, false discovery rate.
lncRNAs	logFC	P value	FDR
SLC8A1-AS1	-6.01081	8.46731e-91	1.56611e-86
IL12A-AS1	-4.76397	4.6295e-69	4.28136e-65
HCG22	-6.17275	9.06964e-47	2.39646e-43
LINC02303	-7.90178	7.1493e-45	1.32233e-41
LINC02487	-5.51141	4.11997e-32	1.77216e-29
LINC00330	-5.19398	8.33438e-32	3.35115e-29
LINC02538	-5.2029	4.77066e-31	1.60433e-28
FALEC	-4.12427	7.64148e-24	1.03166e-21
LINC00551	-3.75754	8.8757e-21	8.00805e-19
MIR133A1HG	-5.6151	4.47912e-20	3.74868e-18
ACBD3-AS1	-2.5718	3.94771e-16	1.96282e-14
LINC00689	-2.97762	4.32396e-16	2.12138e-14
LINC01765	-5.18323	8.96394e-16	4.1243e-14
HOXC-AS2	4.06399	2.05996e-15	9.11507e-14
LINC02099	-2.6162	2.39328e-15	1.04401e-13
ZNF710-AS1	-1.97787	2.46505e-15	1.07279e-13
G2E3-AS1	7.48475	7.49606e-15	3.06741e-13
UCKL1-AS1	-2.13387	3.03079e-14	1.11668e-12
FOXD2-AS1	2.34324	1.2643e-13	4.22103e-12
LINC02036	-2.89796	1.68577e-13	5.49911e-12
ELN-AS1	-3.00433	4.97319e-13	1.51789e-11
WDR86-AS1	-2.97218	6.86242e-13	2.05717e-11
ADAMTS9-AS1	-2.53176	8.24964e-13	2.43747e-11
LINC01269	-2.81106	1.01395e-12	2.94413e-11
LINC02028	-2.69883	1.49857e-12	4.19964e-11
LINC02163	6.06371	1.55607e-12	4.35418e-11
AFDN-DT	-1.91842	2.25848e-12	6.15212e-11
FIRRE	5.22843	2.57081e-12	6.95172e-11
CASC9	4.35488	5.02183e-12	1.28648e-10
UMODL1-AS1	-3.73068	7.04414e-12	1.74884e-10
EPB41L4A-DT	-1.75511	8.26873e-12	2.015e-10
C10orf71-AS1	-5.02474	1.80741e-11	4.15278e-10
LINC00898	5.59329	2.14614e-11	4.87654e-10
SRGAP3-AS2	-4.74125	2.43735e-11	5.46439e-10
RNF144A-AS1	4.21057	3.12424e-11	6.8711e-10
LINC01633	4.08487	4.35684e-11	9.34851e-10
DNAH17-AS1	3.40284	4.67094e-11	9.99928e-10
DUXAP8	4.1546	7.11976e-11	1.46972e-09
LINC01395	-2.66784	7.46983e-11	1.54027e-09
PLBD1-AS1	-2.01942	7.61492e-11	1.56495e-09
LINC01983	-3.2788	1.4225e-10	2.78419e-09
HAGLROS	3.34047	1.43687e-10	2.8034e-09
LINC00900	-2.236	1.68596e-10	3.26187e-09
LINC02166	-1.77953	3.06575e-10	5.64221e-09
LANCL1-AS1	-2.43449	4.64847e-10	8.25918e-09
LINC01943	2.53796	5.22462e-10	9.19453e-09
HOXC-AS1	4.23595	5.55078e-10	9.7315e-09
LINC01889	-4.0822	5.88959e-10	1.02727e-08
LINC01829	-3.07662	5.93832e-10	1.03423e-08
HEXA-AS1	-1.74088	8.08535e-10	1.37073e-08
LINC01929	5.44197	8.66394e-10	1.45813e-08
TRPM2-AS	4.49938	1.1719e-09	1.94225e-08
HOXC13-AS	4.90864	1.57199e-09	2.55272e-08
GSEC	2.07875	1.88841e-09	3.01623e-08
DLX6-AS1	3.84585	2.81481e-09	4.36036e-08
LINC01614	6.17093	3.62908e-09	5.53824e-08
DNMBP-AS1	-2.05191	4.63033e-09	6.91224e-08
TMEM51-AS1	-1.7961	4.75062e-09	7.08038e-08
LINC02450	5.12938	4.99322e-09	7.41209e-08
TTC39A-AS1	-2.23628	5.89963e-09	8.61923e-08
SLC12A5-AS1	3.95002	7.56679e-09	1.08577e-07
LINC01405	-3.22481	8.56583e-09	1.21405e-07
PCBP1-AS1	-1.08029	9.45297e-09	1.32356e-07
LINC02154	6.04683	1.05355e-08	1.45835e-07
LINC01980	4.49426	1.28279e-08	1.74588e-07
AFAP1-AS1	6.80102	1.31177e-08	1.7827e-07
TM4SF19-AS1	2.76123	1.36278e-08	1.84389e-07
HOXA10-AS	2.91584	1.40707e-08	1.89965e-07
LINC01940	-3.08841	1.7282e-08	2.28483e-07
LINC02100	3.82117	1.89201e-08	2.47745e-07
MIR503HG	3.71956	1.92876e-08	2.52115e-07
TMEM220-AS1	-1.682	2.24687e-08	2.88999e-07
C5orf66	-1.47736	2.76686e-08	3.48371e-07
LINC02428	3.88088	3.35599e-08	4.14645e-07
LINC01558	-1.53927	3.63638e-08	4.46603e-07
LINC02593	-1.92088	3.88404e-08	4.73702e-07
CLEC12A-AS1	4.27111	4.14878e-08	5.03515e-07
TEX41	4.11866	4.2145e-08	5.10487e-07
FEZF1-AS1	5.32149	5.08783e-08	6.08304e-07
CASC15	2.31661	5.44091e-08	6.46144e-07
MYHAS	-2.43054	5.93162e-08	6.98798e-07
DLX2-DT	4.79997	5.95765e-08	7.01417e-07
LINC00941	3.30143	6.38575e-08	7.47064e-07
DSG1-AS1	-1.9873	6.54621e-08	7.64386e-07
ADARB2-AS1	-2.7983	6.68488e-08	7.78611e-07
EP300-AS1	-1.48449	6.79521e-08	7.88978e-07
C8orf34-AS1	-3.12488	6.92617e-08	8.02169e-07
ZNF503-AS1	-2.49753	7.32041e-08	8.44656e-07
MELTF-AS1	2.07975	7.57684e-08	8.69903e-07
LINC00519	2.95235	7.77955e-08	8.90963e-07
LINC01234	6.75003	1.00669e-07	1.12573e-06
ZFPM2-AS1	4.46449	1.05195e-07	1.1714e-06
LINC01694	5.13873	1.38011e-07	1.48669e-06
LINC02043	3.25659	1.50047e-07	1.60699e-06
HOXA-AS2	-1.47826	1.60384e-07	1.70486e-06
LINC01091	-1.89617	1.69196e-07	1.78621e-06
LBX2-AS1	1.56012	1.7846e-07	1.87652e-06
HOTAIR	4.80118	1.93658e-07	2.02367e-06
LINC00668	5.25331	1.96559e-07	2.05051e-06
LINC00908	-1.99243	2.08636e-07	2.16672e-06
APCDD1L-DT	3.99425	2.96506e-07	2.98215e-06
ZNF295-AS1	-1.56506	3.01748e-07	3.02993e-06
DDX11-AS1	2.05149	3.56457e-07	3.52701e-06
LINC02015	4.91024	3.86839e-07	3.79776e-06
B4GALT1-AS1	-1.27479	5.00106e-07	4.7754e-06
LINC02137	3.54672	5.12268e-07	4.87644e-06
HOXC-AS3	4.75278	5.23191e-07	4.96508e-06
GCC2-AS1	1.9414	5.34895e-07	5.06316e-06
SMILR	-1.8997	5.39567e-07	5.10216e-06
BREA2	2.04284	5.53251e-07	5.21556e-06
KCNMB2-AS1	2.14055	5.77089e-07	5.4182e-06
FOXD3-AS1	3.76886	6.24305e-07	5.77935e-06
C5orf66-AS1	-2.14424	6.57165e-07	6.05325e-06
HOXA11-AS	4.05654	6.82974e-07	6.27847e-06
LINC02544	3.61938	7.29845e-07	6.66299e-06
LINC02560	-1.85291	7.68191e-07	6.97519e-06
AQP4-AS1	-2.63513	7.75387e-07	7.03018e-06
LINC00922	5.78054	7.93904e-07	7.17998e-06
MIAT	3.09982	8.77206e-07	7.83807e-06
SERPINB9P1	-1.66846	9.17337e-07	8.16117e-06
LINC01160	4.49715	9.28802e-07	8.25126e-06
LINC01561	4.48419	9.49679e-07	8.42863e-06
DDN-AS1	2.13224	9.68415e-07	8.58256e-06
LINC00520	4.44613	9.99033e-07	8.8159e-06
SLC16A1-AS1	1.38176	1.13894e-06	9.89933e-06
LINC02466	5.46591	1.1623e-06	1.00882e-05
LINC02321	2.72394	1.17087e-06	1.01578e-05
GACAT2	5.40616	1.26142e-06	1.08315e-05
NAALADL2-AS2	5.12954	1.26216e-06	1.08329e-05
LINC00944	3.05687	1.27235e-06	1.09153e-05
C1RL-AS1	1.53798	1.29441e-06	1.10686e-05
RNF139-AS1	1.50285	1.33858e-06	1.14041e-05
LINC00174	2.10355	1.39656e-06	1.18273e-05
WDFY3-AS2	-1.09075	1.41435e-06	1.19531e-05
LINC01303	2.5577	1.6948e-06	1.40633e-05
LINC01436	3.61828	1.8284e-06	1.50503e-05
BHLHE40-AS1	-1.17411	1.88604e-06	1.54679e-05
LUCAT1	2.24682	1.90058e-06	1.55751e-05
PCAT7	2.99033	1.91874e-06	1.5717e-05
MIR1-1HG	-4.3579	1.93535e-06	1.5832e-05
TSPEAR-AS2	4.98104	1.94624e-06	1.59071e-05
SNAP25-AS1	3.89302	2.23836e-06	1.80135e-05
ATP1B3-AS1	2.655	2.24395e-06	1.80374e-05
LINC02081	3.32479	2.51981e-06	2.002e-05
LINC01807	5.68372	2.5429e-06	2.01687e-05
ZKSCAN2-DT	1.89399	2.59765e-06	2.05501e-05
TBILA	2.1186	2.64541e-06	2.08566e-05
LINC00622	2.52146	2.82333e-06	2.20804e-05
MNX1-AS1	4.26094	2.88824e-06	2.25405e-05
NKILA	2.43835	2.93338e-06	2.28446e-05
IDI2-AS1	-1.76504	3.18263e-06	2.45889e-05
SH3PXD2A-AS1	-1.54847	3.2029e-06	2.47146e-05
NCK1-DT	1.25079	3.56964e-06	2.71928e-05
LINC01587	-1.76399	3.86022e-06	2.90003e-05
FAM225A	2.15638	3.95078e-06	2.96084e-05
EMX2OS	-2.02151	3.95286e-06	2.9612e-05
MYOSLID	2.53511	4.05328e-06	3.03029e-05
LINC01711	3.57807	4.32353e-06	3.21414e-05
HOXB-AS4	5.09128	4.37159e-06	3.24336e-05
KCNQ1OT1	1.6747	4.42863e-06	3.28041e-05
PLS3-AS1	1.88061	4.69243e-06	3.45094e-05
CLDN10-AS1	-2.77357	4.7045e-06	3.4557e-05
LINC00460	4.65636	4.76741e-06	3.49905e-05
UVRAG-DT	-1.53045	4.98229e-06	3.63377e-05
A1BG-AS1	1.9877	5.28354e-06	3.82184e-05
LINC02584	3.30338	5.50557e-06	3.96538e-05
HRAT5	-1.35643	5.83422e-06	4.18417e-05
LUARIS	3.24168	5.88766e-06	4.21596e-05
LINC01426	2.69779	5.91289e-06	4.23239e-05
FOXP4-AS1	2.84242	6.15728e-06	4.38695e-05
LINC00659	3.97272	6.47696e-06	4.58644e-05
PART1	-2.00508	6.48948e-06	4.59355e-05
STXBP5-AS1	-1.63261	7.10597e-06	4.98226e-05
DLGAP1-AS2	2.40435	7.21565e-06	5.04768e-05
KDM4A-AS1	1.94792	7.53417e-06	5.25064e-05
INSYN1-AS1	-2.39697	7.65325e-06	5.3256e-05
LINC00943	2.90171	7.7992e-06	5.41088e-05
LINC02527	4.97117	7.95568e-06	5.50705e-05
LINC02041	2.64241	8.24643e-06	5.68067e-05
HAGLR	2.23174	8.6843e-06	5.95127e-05
MIR9-3HG	2.88722	9.23036e-06	6.28357e-05
IGF2BP2-AS1	2.86555	9.33025e-06	6.34457e-05
POU6F2-AS2	2.72651	9.80597e-06	6.61215e-05
LINC00525	3.91143	9.9475e-06	6.70025e-05
FLG-AS1	-1.73508	1.0165e-05	6.83183e-05
LINC00284	-2.4756	1.07706e-05	7.18663e-05
MSC-AS1	2.16799	1.11208e-05	7.39097e-05
LINC02416	2.27677	1.12256e-05	7.45258e-05
LINC00115	1.55731	1.12975e-05	7.49224e-05
GPR1-AS	5.99038	1.13241e-05	7.50452e-05
ELFN1-AS1	5.39108	1.17108e-05	7.71928e-05
RNF217-AS1	1.54357	1.19155e-05	7.83747e-05
GATA2-AS1	2.16919	1.20037e-05	7.89268e-05
YEATS2-AS1	1.64875	1.31029e-05	8.54854e-05
LINC01050	3.6347	1.3456e-05	8.75729e-05
LINC01096	2.44682	1.35419e-05	8.8008e-05
LINC00528	2.43607	1.4143e-05	9.13689e-05
CADM3-AS1	-1.80946	1.42148e-05	9.17688e-05
KTN1-AS1	1.12469	1.67581e-05	0.000105608
LINC01697	-2.36813	1.79443e-05	0.000111596
MAGEA4-AS1	7.74518	1.85356e-05	0.000114699
LINC01456	5.65266	1.85903e-05	0.000114998
FAM225B	2.55638	2.00189e-05	0.000123028
KCCAT333	-2.32474	2.05822e-05	0.000126098
TSPEAR-AS1	4.17077	2.37462e-05	0.000143158
DLEU7-AS1	2.06406	2.51665e-05	0.000150738
LINC02457	4.27579	2.54313e-05	0.000152176
H19	-2.11431	2.59118e-05	0.000154701
P3H2-AS1	3.65126	2.64212e-05	0.000157336
MAFA-AS1	3.78675	2.66634e-05	0.000158473
LINC01460	3.31484	2.80655e-05	0.000165619
LINC01679	1.76997	2.80913e-05	0.000165681
RUNDC3A-AS1	2.42014	2.86998e-05	0.000168571
MAGEA10-MAGEA5	5.08513	2.96974e-05	0.000174044
LINC00887	-1.72602	3.02956e-05	0.000177101
LINC01842	2.85459	3.10816e-05	0.000181352
LINC01410	1.33361	3.14493e-05	0.000182978
LINC01634	-2.01025	3.2131e-05	0.000186358
LINC02582	7.64018	3.22613e-05	0.000187055
STAM-AS1	1.89366	3.32053e-05	0.000191926
LINC01249	6.74204	3.38005e-05	0.000195001
LINC01311	1.40995	3.41499e-05	0.000196649
LINC00355	6.33237	3.50322e-05	0.000201104
LINC02038	-2.1314	3.55732e-05	0.000203703
LINC01629	4.59599	3.56766e-05	0.00020398
LINC01136	2.38274	3.61201e-05	0.00020607
HCP5	1.31941	3.65547e-05	0.000208292
GASAL1	2.24699	3.7387e-05	0.00021225
CCDC18-AS1	1.21068	3.86142e-05	0.000218626
SNHG1	1.11439	4.00829e-05	0.000225616
LINC00942	5.02523	4.10347e-05	0.000230203
LINC00518	4.09369	4.18911e-05	0.000234296
LINC01615	3.02918	4.3843e-05	0.000243886
LINC02475	5.2248	4.41767e-05	0.000245447
RBAKDN	3.50034	4.4911e-05	0.000249078
LINC01524	3.27578	4.66011e-05	0.00025714
LINC01305	3.59609	4.81681e-05	0.000264918
CCDC183-AS1	-1.00862	4.88028e-05	0.000267886
LINC01978	-1.72584	5.29695e-05	0.000288636
TMEM147-AS1	1.15152	5.96703e-05	0.000320388
SMC2-AS1	-1.62145	6.26181e-05	0.000333963
LINC02577	3.0879	6.28114e-05	0.000334556
TBX2-AS1	2.07257	6.42228e-05	0.000340655
LINC01281	2.74409	6.71892e-05	0.000354473
HOXB-AS2	-1.65227	6.7555e-05	0.000356084
POT1-AS1	1.90731	7.03272e-05	0.000368909
SATB1-AS1	1.98192	7.1058e-05	0.000372214
LINC01726	-2.68096	7.33736e-05	0.000382934
FLJ42969	2.81065	7.63473e-05	0.000396542
SPRY4-AS1	2.20814	7.77862e-05	0.00040312
LINC02454	3.04106	7.9821e-05	0.000412278
LINC00327	-1.36493	8.07515e-05	0.000416271
C10orf91	2.18233	8.3044e-05	0.000426543
TNK2-AS1	1.44	9.12101e-05	0.000463595
MIR1-1HG-AS1	-2.15855	9.4227e-05	0.000477486
LINC01235	1.74535	9.74429e-05	0.000491359
LINC02518	4.44045	9.88795e-05	0.000497747
LINC01094	1.42999	9.92903e-05	0.000499449
GAPLINC	3.64806	0.000100375	0.000504232
RUSC1-AS1	1.26478	0.000101211	0.000507801
LINC01956	4.4547	0.000102876	0.00051566
LINC02086	3.64282	0.000105083	0.000525017
LINC02522	6.17559	0.000109151	0.000541682
PVT1	1.12668	0.000110808	0.00054873
LINC01063	1.98694	0.000113914	0.000561872
MEF2C-AS1	-1.57047	0.000117718	0.000577844
LINC01355	1.70893	0.000118604	0.000581731
LINC01358	-1.87049	0.000118901	0.000582333
SNHG10	1.08955	0.000123342	0.000600983
LINC00839	2.54344	0.000124907	0.000607009
LSAMP-AS1	3.0706	0.000126842	0.000614526
LINC02158	3.77884	0.000129043	0.00062367
LINC01356	2.71586	0.000133275	0.000641846
LINC02073	2.93214	0.000133642	0.000643208
ADAMTS9-AS2	-1.24214	0.000134182	0.000645639
LINC01748	1.70683	0.000134991	0.000649024
LINC01132	-1.13767	0.000138582	0.000664732
LINC00299	1.96086	0.000139045	0.000666525
C22orf34	1.95385	0.00014208	0.000678345
FSIP2-AS1	2.47483	0.000143696	0.000685201
LINC02195	2.04416	0.000143959	0.000686256
MMP25-AS1	1.00429	0.000144884	0.000690307
ABCA9-AS1	3.28908	0.000150021	0.000712216
MIR2117HG	2.41775	0.000154259	0.000729341
ZNF582-AS1	-1.20734	0.000154629	0.000730735
LINC00626	4.52503	0.000154912	0.000731864
LINC02109	4.22677	0.000180229	0.000835677
MAP3K20-AS1	1.71468	0.000187406	0.000864837
LINC02438	4.83791	0.000189082	0.000871916
FLJ12825	2.67651	0.00019265	0.000885721
TEX26-AS1	-1.47314	0.000193219	0.000887894
LINC01572	1.353	0.000205984	0.000938627
CASC18	2.29695	0.000210925	0.00095666
LINC02393	5.53246	0.000211247	0.000957889
LINC02145	2.61078	0.000213936	0.000967709
LINC02561	3.02192	0.000216693	0.000978878
LINC01004	1.24633	0.000217411	0.000981482
ELDR	3.19742	0.000225088	0.00101074
FAM87A	1.75119	0.000228296	0.00102365
LINC02575	5.19907	0.000230048	0.00103101
ERVH48-1	4.87729	0.000234569	0.00104822
LHX1-DT	3.97697	0.000236586	0.00105484
LINC00278	-1.98725	0.00023662	0.00105484
MMP2-AS1	2.5716	0.000242018	0.00107605
ADIRF-AS1	1.16081	0.000243645	0.0010825
LNCOC1	1.61497	0.000247626	0.00109719
LINC00858	3.27907	0.000254804	0.00112452
ADGRD1-AS1	5.12861	0.000257916	0.00113653
PLCG1-AS1	1.6903	0.000264792	0.00116222
TMEM92-AS1	1.94139	0.00026938	0.00117844
SLC2A1-AS1	1.4127	0.000270754	0.00118305
LINC02244	3.44403	0.000273138	0.00119206
LINC01010	1.96997	0.000273574	0.0011934
CFAP58-DT	1.87457	0.000282173	0.00122715
LINC00271	-1.04791	0.000288144	0.00124772
LINC01169	5.40359	0.000299061	0.00128938
ALMS1-IT1	1.4155	0.000300713	0.0012956
INHBA-AS1	2.63033	0.000312548	0.00133755
RBPMS-AS1	-1.41491	0.000319321	0.00136275
LINC00592	1.91377	0.000327499	0.00139315
BOK-AS1	6.51374	0.000334551	0.00141728
LINC01644	-1.88778	0.000335398	0.00142054
LINC02076	2.34577	0.0003397	0.00143482
LINC00973	4.4443	0.00034476	0.00145354
LINC00491	1.74081	0.000396192	0.00164562
LINC00624	2.22556	0.000400306	0.0016601
LINC01117	1.88774	0.000405312	0.00167823
ASAP1-IT2	1.94406	0.000409198	0.00169091
LINC01139	3.67956	0.000415339	0.00171323
LINC00974	5.68523	0.000416602	0.00171691
LINC00514	3.45394	0.000417247	0.0017188
SLC7A11-AS1	3.41093	0.000420765	0.00173059
C2orf48	1.66766	0.00042505	0.00174627
LACTB2-AS1	1.5463	0.000432659	0.00177383
MIR181A2HG	1.79451	0.000434878	0.00178111
EGFR-AS1	2.75748	0.000435183	0.00178197
LINC01322	3.52178	0.000460524	0.00186754
LINC02298	1.51973	0.000462524	0.00187442
LINC01910	2.49855	0.000478783	0.001931
L3MBTL4-AS1	1.89326	0.000479793	0.00193423
IGFL2-AS1	2.97884	0.000486089	0.00195705
LINC00393	3.56925	0.00048725	0.0019613
DSCR9	1.59917	0.000487469	0.00196175
LINC02418	4.8231	0.000491883	0.00197737
PURPL	5.27412	0.000494957	0.00198713
LINC00862	3.40799	0.000510916	0.00204278
LINC00243	1.61571	0.000524502	0.00208673
LINC01232	1.0243	0.000535055	0.00212187
SCARNA9	-1.00437	0.000552263	0.00218309
LINC01341	2.44456	0.00056304	0.00221952
OBSCN-AS1	1.32161	0.00057932	0.00227552
LINC02328	1.93791	0.000607131	0.00237009
SNHG25	1.44302	0.00060952	0.00237892
ATP2A1-AS1	1.34849	0.000630529	0.00244543
GAS6-DT	1.34744	0.000662689	0.00255144
LINC01901	3.95082	0.00068142	0.00261322
LINC01914	2.49686	0.000730724	0.00277753
LINC02525	7.22941	0.000735971	0.00279461
MIR155HG	1.49248	0.000760974	0.00287421
HIPK1-AS1	-1.16704	0.00078701	0.00296045
LINC01343	4.01879	0.000796187	0.00298586
SEPT4-AS1	1.45739	0.000807975	0.00302088
LINC01089	1.16702	0.000808864	0.00302359
UBE2Q1-AS1	1.68185	0.000813896	0.00303933
LINC02026	-1.25166	0.000851184	0.00316261
ARLNC1	2.86891	0.000865415	0.00320712
LINC01869	1.63786	0.000922165	0.00338084
TMEM132D-AS1	6.33881	0.000974565	0.00354346
CASC11	1.33055	0.000984015	0.0035722
LINC00461	3.84006	0.000986656	0.00358108
SNHG12	1.22171	0.000992169	0.00359897
SOX21-AS1	-1.14456	0.000993186	0.00360125
LINC02576	2.11608	0.00100379	0.00363401
ERICD	1.15694	0.00100744	0.00364508
C2-AS1	2.94976	0.00101352	0.00366421
LINC01176	1.32481	0.00102577	0.00370269
PLA2G4E-AS1	1.8683	0.00103292	0.00372486
DIRC3	2.07867	0.00104129	0.0037514
HOTTIP	2.7306	0.00105184	0.00378205
LEF1-AS1	1.40606	0.00106852	0.00383158
LINC01194	6.701	0.00107568	0.00384979
MIR663AHG	5.00715	0.00107915	0.00385998
LINC00392	6.38218	0.00108088	0.00386392
LINC00702	-1.36646	0.00109747	0.00391629
LINC01619	1.42418	0.00109765	0.00391629
LINC02362	1.98216	0.00112748	0.00400283
MAMDC2-AS1	-1.14201	0.00114725	0.00406314
HIF1A-AS1	1.67023	0.00118487	0.00418313
LINC01508	2.97938	0.00118946	0.00419691
LINC02280	2.5671	0.00119003	0.00419812
LINC02519	2.18878	0.00119558	0.00421276
MIR2052HG	1.93674	0.00120642	0.00424624
NCBP2-AS1	1.59449	0.00122727	0.00430813
LINC01315	-1.21042	0.00129378	0.00449809
MIR137HG	3.97173	0.00132012	0.00457762
SOX2-OT	2.41343	0.00132706	0.00459535
LINC01518	3.48943	0.00133318	0.00461337
LINC00894	1.3458	0.00138813	0.00477508
LINC01297	5.4069	0.00142556	0.00488854
CASC20	3.31674	0.00146125	0.00499027
LINC02253	3.44505	0.00146377	0.00499425
DBH-AS1	1.73861	0.00147419	0.00502519
LINC02241	5.027	0.0014803	0.00504144
LINC01857	2.2284	0.00151803	0.00514334
ESRG	4.78687	0.0015602	0.00526405
LINC01419	6.36267	0.00157364	0.00530166
LINC00578	1.56311	0.00159927	0.00537331
VPS9D1-AS1	1.12434	0.00160465	0.00539041
LINC01033	3.1722	0.00161438	0.00541816
PWAR6	-1.17447	0.00162003	0.00543312
ZNF252P-AS1	1.36133	0.00162212	0.00543725
PACERR	2.32172	0.00164623	0.00550709
LINC02384	1.90028	0.00166325	0.00555496
MIR3681HG	2.5999	0.00166838	0.00556908
LINC01287	5.27542	0.00167134	0.00557697
HS1BP3-IT1	2.31459	0.00167925	0.00559829
FLJ36000	5.68891	0.00168331	0.00560882
LINC01484	2.53361	0.00168636	0.00561696
LINC01989	4.64197	0.00169811	0.00565201
LINC01116	1.75478	0.00169989	0.00565691
LINC02367	1.75631	0.0017538	0.00581122
LINC01338	2.83826	0.00188444	0.00619637
HOXB-AS1	1.09064	0.00191969	0.00629214
IGBP1-AS1	1.48797	0.00195177	0.00638041
LINC00504	2.58713	0.00195746	0.00639782
RBMS3-AS3	-1.46225	0.00196172	0.00641058
ITGB1-DT	1.97444	0.0019668	0.00642379
FLJ22447	1.24819	0.00196743	0.00642471
MIR548XHG	6.56749	0.00197949	0.00645727
LINC00911	3.78162	0.00200003	0.00651048
STAG3L5P-PVRIG2P-PILRB	1.0237	0.00203715	0.00661038
LINC02167	7.34076	0.00208535	0.00674666
LINC01012	1.54036	0.00214777	0.00691463
DSG2-AS1	1.48164	0.00222259	0.00712462
PICSAR	2.99784	0.0022303	0.00714436
SCGB1B2P	2.44615	0.00225087	0.00720653
RFPL3S	1.70054	0.00231143	0.00737362
FAM30A	2.13473	0.00232149	0.00740059
RFPL1S	1.9844	0.00233527	0.00743813
LINC01087	3.97837	0.00239302	0.00759461
HIF1A-AS2	1.35194	0.00241859	0.00766523
LINC00486	3.61572	0.00243915	0.00772114
ZFHX2-AS1	1.10021	0.0025057	0.00790338
PYCARD-AS1	1.43388	0.00250821	0.00790859
MINCR	1.03543	0.00254677	0.0080206
C9orf139	1.28293	0.00255505	0.00803437
NFYC-AS1	1.04456	0.00263787	0.00826671
LINC01527	2.87906	0.00268014	0.00837361
LINC02476	6.09783	0.00269323	0.00841025
STARD4-AS1	1.33765	0.00271772	0.008481
PRMT5-AS1	1.25548	0.0027732	0.00863229
TMSB15B-AS1	1.52659	0.0027862	0.00866402
LINC00323	-1.0409	0.00284719	0.00882844
C22orf24	1.29439	0.00288218	0.00891339
LINC01833	3.68321	0.00289272	0.00893664
DRAIC	-1.07277	0.00289537	0.00894091
LINC00173	1.59391	0.0029044	0.00896376
DEPDC1-AS1	1.30255	0.00293004	0.00903536
C9orf163	1.16066	0.00298478	0.00917204
MCCC1-AS1	1.44607	0.0030075	0.00923067
LINC02042	3.3497	0.00300933	0.00923369
MIR17HG	1.37451	0.0030268	0.00927805
MRVI1-AS1	-1.27811	0.0030274	0.00927836
LINC00184	1.69433	0.00305406	0.00933376
LINC01727	3.19952	0.00310247	0.00944582
CCDC144NL-AS1	2.68576	0.00311516	0.00947819
LLPH-DT	1.40731	0.00314208	0.00954753
SLFNL1-AS1	1.06166	0.00316357	0.00960653
LINC01137	1.01525	0.00318681	0.00966757
TTLL10-AS1	-1.42467	0.00320981	0.00972777
LINC01592	2.40948	0.00328197	0.00992371
HCG15	1.33092	0.00328489	0.00992928
SNHG26	1.07632	0.00331854	0.010013
CD44-AS1	1.17834	0.00344236	0.0103478
LINC00589	-1.22994	0.0035299	0.0105731
LINC00632	1.72417	0.00354968	0.0106203
PCED1B-AS1	1.22601	0.00355177	0.0106224
TTTY14	-1.70369	0.00355194	0.0106224
DGCR9	1.70699	0.00356845	0.0106611
LINC00052	5.13621	0.00356997	0.0106638
KCNH1-IT1	2.53365	0.00357254	0.0106698
LINC01896	4.76956	0.00364606	0.0108403
LINC01179	3.8969	0.00366385	0.0108844
EWSAT1	2.92695	0.00367619	0.0109141
THORLNC	1.64096	0.00369254	0.0109539
MANEA-DT	1.12563	0.00378979	0.0111778
LINC00221	7.50271	0.00380984	0.011228
LINC01270	1.1861	0.0038682	0.0113848
OSMR-AS1	1.09597	0.00388899	0.0114394
LNCSRLR	1.56654	0.00389263	0.0114447
CACTIN-AS1	1.10191	0.0039391	0.0115537
KCTD21-AS1	1.30312	0.0039545	0.0115915
LINC00896	1.60465	0.00395958	0.0116046
LINC01667	5.63559	0.00402549	0.0117753
LINC02492	5.92048	0.0040276	0.011779
LINC00871	3.38664	0.00404676	0.0118207
LINC02570	2.51514	0.00413012	0.0120338
HPN-AS1	2.24679	0.00419451	0.012189
FAM230C	6.17453	0.00419457	0.012189
PTGES2-AS1	1.3978	0.00426187	0.0123477
CEP83-DT	1.14493	0.0042699	0.0123687
LINC01271	1.44137	0.00433054	0.0125211
FLJ16779	2.35905	0.0043505	0.0125749
KLHL7-DT	1.29971	0.00438526	0.0126543
LINC00892	-1.11568	0.00454885	0.0130585
LINC01605	1.38926	0.00455034	0.0130607
PLAC4	-1.23418	0.0045672	0.0130949
LINC02141	3.91642	0.0047243	0.0134722
LINC01964	2.93081	0.00481527	0.0136894
ZFY-AS1	-1.71564	0.0048439	0.0137602
LINC01698	1.5741	0.00496067	0.0140471
LINC00216	1.12632	0.00496221	0.0140488
HLA-DQB1-AS1	1.53961	0.00498593	0.014103
CDKN2B-AS1	1.62317	0.00522515	0.0146764
H1FX-AS1	1.00179	0.00545308	0.0152097
LEMD1-AS1	1.98989	0.00549481	0.0152968
LINC01559	-1.47546	0.00565773	0.0156608
CASC8	1.11208	0.00566248	0.0156692
FRG1-DT	1.32495	0.00570068	0.0157537
OVAAL	4.21836	0.00588295	0.0161873
LINC00884	1.22762	0.00597017	0.0163761
BLACAT1	1.10638	0.0061865	0.0168794
DNM1P35	1.11387	0.00622952	0.0169743
SATB2-AS1	1.17602	0.00642937	0.0174443
DENND5B-AS1	2.51581	0.00648197	0.0175509
MANCR	1.76306	0.00671913	0.0180977
HM13-IT1	1.10417	0.00679386	0.0182644
MTUS2-AS1	2.22662	0.00688677	0.0184739
LINC01393	1.39854	0.00693245	0.0185534
MORC2-AS1	1.03984	0.00701515	0.0187557
HOMER3-AS1	1.01849	0.00702428	0.0187693
LINC02188	-1.21009	0.00728101	0.0193685
DLGAP1-AS5	-1.87115	0.00742645	0.0196931
IGF2-AS	1.67086	0.00750746	0.0198711
LINC01828	1.73231	0.00755533	0.0199747
LINC01602	3.47263	0.00759967	0.0200776
SOCS2-AS1	1.33756	0.00762674	0.0201434
FLJ33534	2.18295	0.00770311	0.0203074
DSCR8	5.85449	0.00781786	0.0205612
LINC00958	1.15584	0.00781913	0.0205612
MGC32805	-1.14224	0.00790688	0.0207647
WASIR2	1.76868	0.00792884	0.0208135
LINC01391	2.30844	0.00848884	0.0220333
RAMP2-AS1	-1.00189	0.00863492	0.0223623
DISC1FP1	2.4121	0.00925957	0.0236816
HAS2-AS1	1.41633	0.00948728	0.0241637
FMR1-IT1	1.26851	0.00957545	0.0243514
LINC02484	5.57077	0.00964158	0.0245027
DKFZp779M0652	-1.08799	0.00970619	0.0246398
LINC00996	1.27712	0.00971978	0.0246642
LINC02128	2.71056	0.00992609	0.0251256
C9orf170	1.78302	0.010226	0.0257579
PRC1-AS1	1.15991	0.0103521	0.026026
LINC01998	3.18962	0.0103913	0.0260996
MIR222HG	1.06747	0.0104458	0.0262259
LINC02267	4.97733	0.0105196	0.0263826
LINC00543	2.11683	0.0105436	0.0264247
EXTL3-AS1	1.11566	0.01065	0.0266516
BCRP3	1.31822	0.0107527	0.026876
LINC00165	3.91676	0.0108643	0.0270963
RHPN1-AS1	1.04161	0.0109982	0.0273676
LINC02302	3.44038	0.0111705	0.0277143
LINC01887	2.47153	0.0111962	0.0277669
CYP4A22-AS1	1.08239	0.0115957	0.0286117
AGAP1-IT1	1.21694	0.011663	0.0287394
LINC00685	1.05661	0.0117395	0.028905
FER1L6-AS2	3.77872	0.0118875	0.0292149
SOX9-AS1	-1.00629	0.0118927	0.0292238
LINC01250	2.71257	0.0119521	0.0293386
ST8SIA6-AS1	3.20346	0.0123648	0.0301754
STEAP3-AS1	1.40162	0.0126321	0.0307184
TDRG1	-1.60171	0.0126516	0.0307495
LINC00462	1.8848	0.013127	0.0317299
LINC00337	1.0872	0.0132604	0.0319939
LINC01854	3.74683	0.0134365	0.03233
LINC01480	1.36079	0.0139016	0.0332503
HDHD5-AS1	1.05865	0.0139995	0.0334281
MIR3142HG	1.15208	0.0140106	0.0334416
UTAT33	1.00227	0.0141094	0.0336256
LINC02583	5.27032	0.0141382	0.0336768
MKNK1-AS1	1.0828	0.0142141	0.0338228
SFTA1P	1.77837	0.0142234	0.0338406
LINC00954	1.47403	0.0144818	0.034358
LHFPL3-AS2	1.97841	0.0148443	0.0350787
NKAIN3-IT1	-1.14203	0.0150022	0.0353975
TSIX	1.97283	0.0153027	0.0360146
LINC02407	1.65738	0.0153722	0.0361597
HAR1A	1.2766	0.0157617	0.0369584
LINC02352	1.01815	0.0160977	0.0376224
LINC01254	2.22958	0.0162334	0.037882
ITGB2-AS1	1.13886	0.0164066	0.0382621
LINC00926	1.15191	0.0170065	0.0393928
IBA57-DT	1.17058	0.0171017	0.0395639
LINC01611	3.41669	0.017116	0.039592
IGFBP7-AS1	1.47104	0.017663	0.0406236
LINC01206	2.57767	0.0176789	0.040645
LINC01977	1.16843	0.017789	0.0408423
LINC01671	-1.08787	0.0178956	0.041031
LINC01564	1.33714	0.018078	0.0413621
LINC00968	-1.0576	0.0182612	0.0417142
LINC02535	1.59747	0.018733	0.0426718
LINC00582	1.59312	0.0188145	0.0428247
LINC02600	1.6406	0.0188506	0.0428803
LINC01029	5.82433	0.0191191	0.0434325
C20orf197	1.96378	0.0197131	0.0444379
NECTIN3-AS1	1.60908	0.0203454	0.0456076
CHRM3-AS2	1.29428	0.0204706	0.0458439
LINC02434	3.99558	0.021012	0.0468464
NRIR	1.48378	0.0210666	0.0469172
STPG3-AS1	1.22646	0.0215287	0.0477729
GK-AS1	1.21069	0.0219107	0.0484994
LINC02084	1.01126	0.0225727	0.0497149
