# Supplementary material for: The Prognostic Signature and Potential Target Genes of Six Long Non-coding RNA in Laryngeal Squamous Cell Carcinoma
Source: Front Genet. 2020 Apr 28;11:413. doi: 10.3389/fgene.2020.00413 (PMC7198905; doi:10.3389/fgene.2020.00413)
Supplement: Supplementary file 7 [file Table_7.XLSX]

## Sheet: WGCNA
Supplementary Table 7. The gene list of four clinically significant modules. PCGs, protein-coding genes.
PCGs	Module
GADD45A	darkgreen
PAM	darkgreen
KCNE3	darkgreen
WLS	darkgreen
ENTPD3	darkgreen
SMS	darkgreen
ETV4	darkgreen
MEST	darkgreen
GPCPD1	darkgreen
CAVIN2	darkgreen
CST1	darkgreen
NIPSNAP1	darkgreen
FGFR1	darkgreen
RAB6A	darkgreen
S100A4	darkgreen
APCDD1	darkgreen
SORBS3	darkgreen
WIF1	darkgreen
MGP	darkgreen
BAMBI	darkgreen
RBP1	darkgreen
CERK	darkgreen
CHGB	darkgreen
MOXD1	darkgreen
ID3	darkgreen
GGH	darkgreen
DMTN	darkgreen
CPLX2	darkgreen
PREB	darkgreen
TUBB2B	darkgreen
BMP4	darkgreen
MGAT5	darkgreen
MYH7B	darkgreen
NKD1	darkgreen
SGPL1	darkgreen
MLEC	darkgreen
DEFA6	darkgreen
DEFA5	darkgreen
CAMK2N1	darkgreen
RERE	darkgreen
NOTUM	darkgreen
C6orf15	darkgreen
ASPSCR1	darkgreen
PTGDS	darkgreen
TP53I3	darkgreen
DUSP16	grey60
MSH6	grey60
TPPP	grey60
PQLC1	grey60
GSPT1	grey60
MLF2	grey60
ATN1	grey60
GSDMA	grey60
ZDHHC11B	grey60
ERC1	grey60
TRAF7	grey60
PSMD3	grey60
PCDH19	grey60
ORMDL3	grey60
LRPPRC	grey60
HNRNPU	grey60
GAPDH	grey60
PLEKHA5	grey60
PEX5	grey60
NDUFA9	grey60
ADIPOR2	grey60
ZBTB7C	grey60
STARD3	grey60
CD9	grey60
M6PR	grey60
YBX3	grey60
TPI1	grey60
TM7SF3	grey60
PHB2	grey60
PEG10	grey60
GRB7	grey60
NUP155	grey60
COPS7A	grey60
WDR43	grey60
SMARCB1	grey60
DNM1L	grey60
USP5	grey60
SCNN1A	grey60
KDM5A	grey60
NARS	grey60
EMG1	grey60
PGAP3	grey60
MIEN1	grey60
SSRP1	grey60
LTBR	grey60
EMP2	grey60
WBP11	grey60
NOP2	grey60
WNK1	grey60
PCSK9	grey60
TBC1D4	grey60
CHD4	grey60
TNFRSF1A	grey60
NCAPD2	grey60
STRAP	grey60
STK38L	grey60
ADGRL2	grey60
AK4	grey60
LFNG	grey60
MRPS35	grey60
MRPL51	grey60
RBBP7	greenyellow
ATP1B1	greenyellow
SSB	greenyellow
MT-ND4	greenyellow
SCD5	greenyellow
SOX2	greenyellow
EPCAM	greenyellow
TSPAN9	greenyellow
KRT8	greenyellow
CAMK1D	greenyellow
MT-CYB	greenyellow
SMARCD2	greenyellow
XPR1	greenyellow
MDH1	greenyellow
GDF15	greenyellow
KRT19	greenyellow
SLC6A8	greenyellow
MT-CO1	greenyellow
KRT18	greenyellow
CKB	greenyellow
NDC80	greenyellow
MGST1	greenyellow
SMCHD1	greenyellow
ALDH1A1	greenyellow
COL4A5	greenyellow
KCTD1	greenyellow
CYP26A1	greenyellow
PPP4R1	greenyellow
ALDH7A1	greenyellow
LMO4	greenyellow
UQCRC2	greenyellow
FKBP4	greenyellow
SLC4A11	greenyellow
PADI3	greenyellow
TWSG1	greenyellow
SLC12A2	greenyellow
RBM38	greenyellow
MTCL1	greenyellow
ACSS1	greenyellow
RAB12	greenyellow
AFG3L2	greenyellow
RDX	greenyellow
PSMG2	greenyellow
PPP1R10	greenyellow
USP14	greenyellow
G0S2	greenyellow
RAB3B	greenyellow
RASIP1	greenyellow
IGFBP2	greenyellow
THOC1	greenyellow
GPT2	greenyellow
ATP13A5	greenyellow
SSBP3	greenyellow
SEH1L	greenyellow
CLDND1	greenyellow
CMAS	greenyellow
TMEM8A	greenyellow
CHMP1B	greenyellow
SEMA6A	greenyellow
RALBP1	greenyellow
SERPINI1	greenyellow
TGIF1	greenyellow
MYL12B	greenyellow
IMPA2	greenyellow
RHOBTB3	greenyellow
SERPINF1	greenyellow
HDAC2	greenyellow
ISYNA1	greenyellow
PTPN2	greenyellow
VAPA	greenyellow
ANKRD12	greenyellow
TCEA3	greenyellow
RAB31	greenyellow
TSPAN13	greenyellow
ENOSF1	greenyellow
PLAC8	greenyellow
COL4A6	greenyellow
KRAS	greenyellow
SPIRE1	greenyellow
LAMA1	greenyellow
YES1	greenyellow
CXCL14	greenyellow
HOMER2	greenyellow
RNMT	greenyellow
CEP192	greenyellow
LPCAT4	greenyellow
GOLT1B	greenyellow
ETNK1	greenyellow
C2CD5	greenyellow
TYMS	greenyellow
LGALS3	greenyellow
ITM2C	greenyellow
MYL12A	greenyellow
ANXA4	greenyellow
SMARCA5	greenyellow
AEBP2	greenyellow
LDHB	greenyellow
GNAS	green
GPI	green
G6PD	green
TXNRD1	green
LUZP1	green
TKT	green
PGD	green
PYCR2	green
PTGR1	green
SDK1	green
CYP4F11	green
IDH1	green
MAP1B	green
PLCH2	green
AKR1C3	green
FTL	green
PGRMC1	green
GCLC	green
FAM20B	green
OSGIN1	green
EIF4A2	green
KLHL24	green
MDGA1	green
ADH7	green
PANX2	green
RIT1	green
CYP4F3	green
AKR1C1	green
ALDH3A1	green
IRAK1	green
ADAM23	green
GDI1	green
GPNMB	green
SPP1	green
PTDSS1	green
FADS1	green
GSTM4	green
TNPO1	green
ABCC1	green
GCLM	green
GRB10	green
FTH1	green
CARD10	green
ABHD4	green
GNA13	green
EPHX1	green
SELENOI	green
AKR1B10	green
GSTM1	green
TSKU	green
MEGF9	green
CES1	green
SLC7A11	green
AKR1B1	green
NDRG4	green
ME1	green
NQO1	green
ABCC3	green
TSPAN7	green
NAMPT	green
SLC6A6	green
AKR1C2	green
CBR1	green
ZDHHC9	green
TRIM16L	green
FZD7	green
MYH11	green
ASPH	green
PKN1	green
ABHD2	green
KIAA1549L	green
FZD10	green
OLFM1	green
SLC1A5	green
BTBD2	green
CDK5RAP2	green
TDP2	green
TALDO1	green
UCHL1	green
TFAP2A	green
CBX2	green
GSTM3	green
CTSB	green
FADS2	green
AFAP1L2	green
EPRS	green
GSN	green
STC2	green
ATRN	green
BMP7	green
RHBDD2	green
MAFG	green
PSMD11	green
GPX2	green
WNT5A	green
SMOC2	green
GPBP1L1	green
GSR	green
MAP2	green
LANCL1	green
SCN9A	green
PIR	green
KDM3A	green
SIPA1L2	green
SOST	green
EHBP1	green
FBN2	green
WNK2	green
MTHFD2	green
FAM102A	green
GSTM2	green
HIP1	green
PHGDH	green
SLC25A36	green
ACKR3	green
STARD7	green
PLPP2	green
TSPAN18	green
PXN	green
NDUFS1	green
GPSM2	green
ST3GAL1	green
NOTCH3	green
FAM84A	green
NFKB1	green
GPC3	green
ALDH3A2	green
POR	green
SC5D	green
SPCS3	green
NTRK2	green
ALOX15	green
PRDX1	green
RGMA	green
HK1	green
BLMH	green
GSTA4	green
SMO	green
GSTA1	green
SRSF4	green
TBL1X	green
ATP2B1	green
TXLNA	green
GABARAPL1	green
HSPA2	green
UGT1A7	green
PCK2	green
B4GALT4	green
TMTC1	green
ITPKB	green
SEL1L3	green
SREBF1	green
MFHAS1	green
PTPRD	green
RASSF9	green
FGFBP2	green
TMC4	green
VDR	green
PC	green
PRKX	green
CYP2S1	green
EFS	green
TUSC3	green
RAB6B	green
TRIM16	green
CPXM2	green
TPD52L1	green
PTP4A2	green
SLC9A3R1	green
RPA1	green
NFE2L2	green
MANSC1	green
PSAT1	green
C3orf58	green
DIP2B	green
MYH14	green
RAB18	green
MKRN1	green
SLCO3A1	green
UBE2H	green
ST6GALNAC2	green
A4GALT	green
PARD3	green
STMP1	green
UGDH	green
FOXE1	green
SLC1A4	green
SUSD4	green
GDA	green
EPHB6	green
